# Supplementary material
Source: Springer Nature journal article supplement (https://www.springermedizin.de/resource/supplementary/12879_2010_1509_MOESM2_ESM.pdf/9442654)

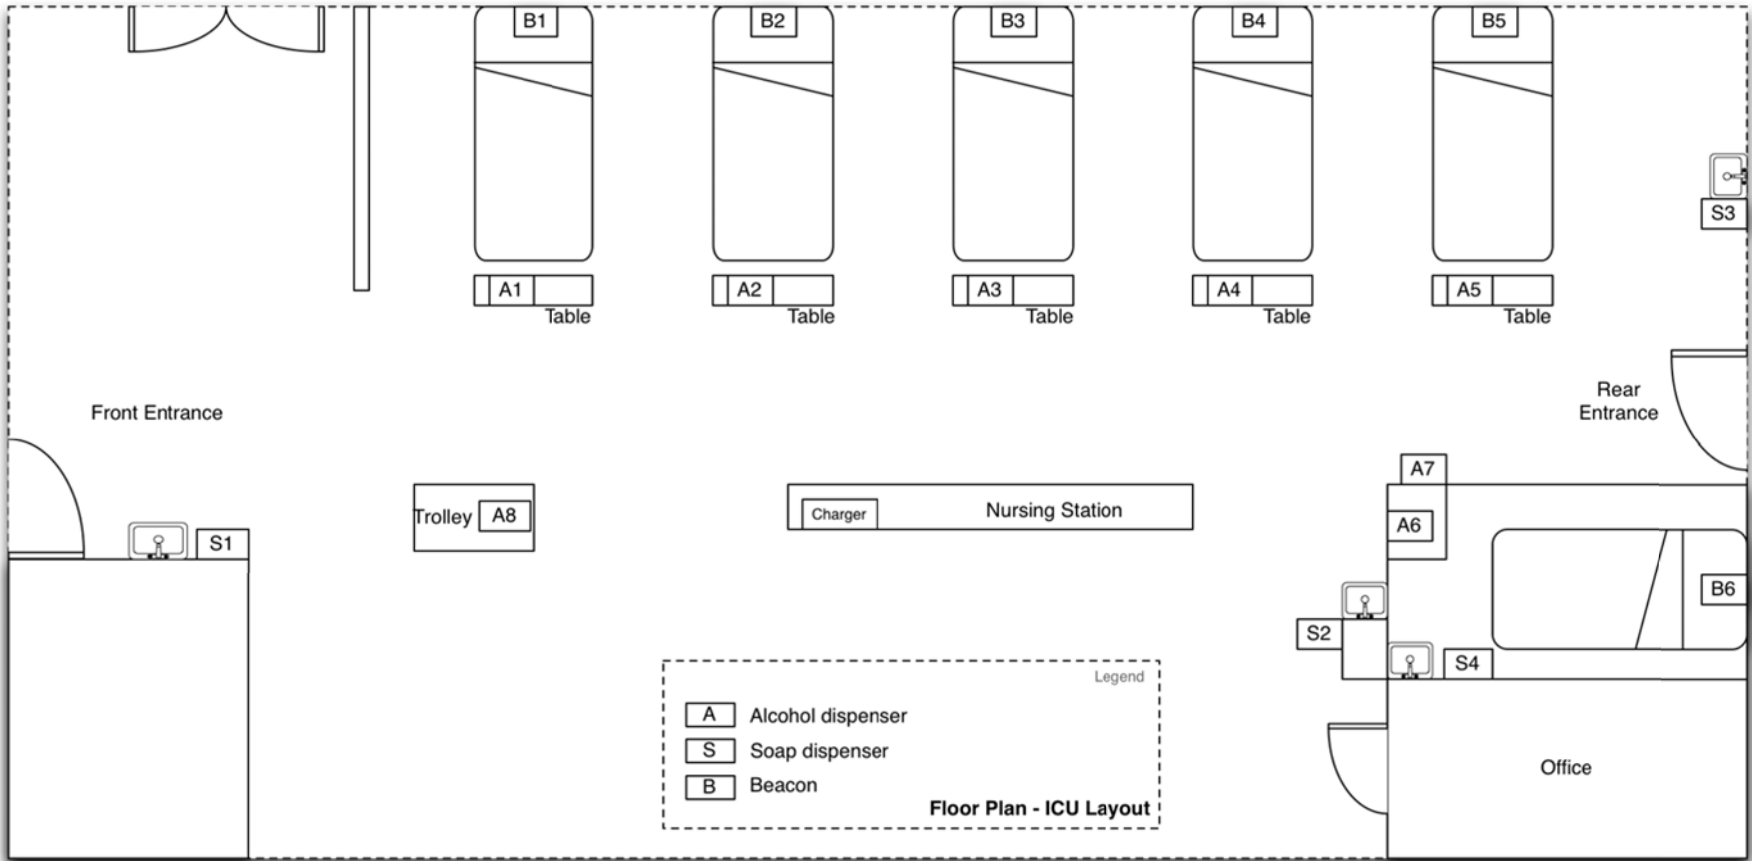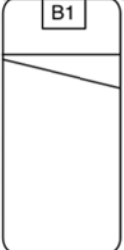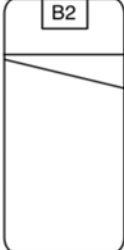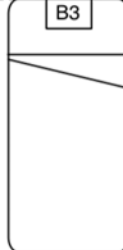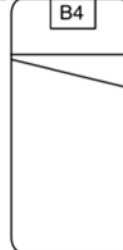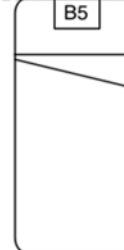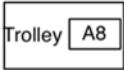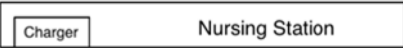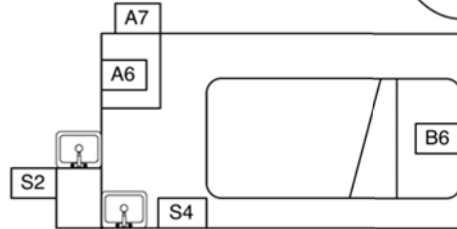

Legend

- A Alcohol dispenser
- S Soap dispenser
- B Beacon

**Floor Plan - ICU Layout**

Supplement: MOESM2 [file 9442654]
